# Supplementary material for: Neuroprotective and Regenerative Effects of Growth Hormone (GH) in the Embryonic Chicken Cerebral Pallium Exposed to Hypoxic–Ischemic (HI) Injury
Source: MDPI journal article supplement (doi:10.3390/ijms23169054), 2022-08-13
Supplement: s1 [file s1]

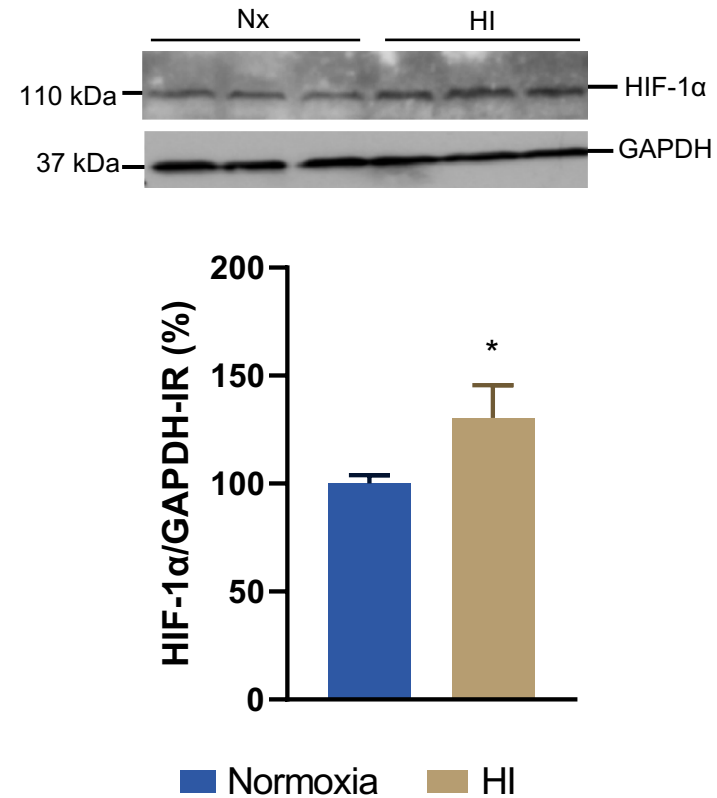

**Figure S1. HIF-1 $\alpha$  immunoreactivity (IR) in pallial tissue of chick embryos exposed to hypoxia-ischemia (HI) injury.** Densitometric analysis of immunoblot stained for HIF-1 $\alpha$  immunoreactivity (IR). The values were corrected and normalized with GAPDH-IR. Bars represent mean  $\pm$  SEM (n = 6 chick embryos per group). The asterisk (\*) indicate significant differences between groups ( $p < 0.05$ ) as assessed by an unpaired Student's t test.
